# Supplementary material for: Towards practical biocatalytic Baeyer-Villiger reactions: applying a thermostable enzyme in the gram-scale synthesis of optically-active lactones in a two-liquid-phase system
Source: Beilstein J Org Chem. 2005 Oct 7;1:10. doi: 10.1186/1860-5397-1-10 (PMC1399458; doi:10.1186/1860-5397-1-10)
Supplement: File 1 — Experimental section. [file Beilstein_J_Org_Chem-01-10-s001.doc]

**Experimental section:**

*Materials*:

All chemicals were purchased from Aldrich, Fluka, Acros, or Merck and used without further purification. Media components were purchased from Applichem or Invitrogen. NADPH and NADP+ were purchased from Jülich Fine Chemicals. The sugars were obtained from Sigma, Fluka or Applichem, the detergents from Applichem and Aldrich. Racemic standards for GC-analysis were synthesized by *m*CPBA-oxidation of the corresponding ketones.

*Preparation of PAMO and PAMO-mutants for in vitro catalysis:*

From an overnight pre-culture of *E. coli* TOP10 [pPAMO] in LB-medium (supplied with 100 g/mL carbenicilline) 200 mL TB-medium (0.1% arabinose, 100 g/ml carbenicilline) were inoculated and grown at 37 °C.Error: Reference source not found,Error: Reference source not found,Error: Reference source not found The cells were harvested and the pellet was briefly frozen at -80 °C and thawed. Then the pellet was resuspended in 50 mM Tris-HCl (pH 7.4) and the cells disrupted by sonication. The resulting lysate was centrifuged (15500 x g, 4 °C) and subsequently incubated at 50 °C for 1 h. After short incubation on ice, the lysate was again centrifuged and subsequently stored in aliquots at either 4 °C or -80 °C. The overall time demand for this procedure is less than 1.5 days. The PAMO activity was measured based on conversion dependent NADPH-depletion at 25 °C under substrate saturation conditions as described previously.Error: Reference source not found,Error: Reference source not found,Error: Reference source not found The protein concentration was determined using the Biorad Bradford assay with BSA as standard. The samples were analyzed by 10% SDS-PAGE. Before use the sample was incubated at 50 °C for 20 min to reactivate PAMO.

*Preparation of 2°ADH for in-vitro catalysis:*

From an overnight preculture of Dh5[pADHB1M1-kan] in LB-medium (supplied with 100 g/mL carbenicilline and 50 g/mL kanamycine), 200 mL TB-medium (supplied with 100 g/mL carbenicilline and 50 g/mL kanamycine) were inoculated and grown at 37 °C without induction. The cells were harvested and resuspended in 50 mM Tris-HCl (pH 8.0). The suspension was frozen in liquid nitrogen and thawed at 50 °C. The resulting suspension was incubated at 85 °C for 15 min, subsequently at 72 °C for 15 min, then incubated on ice for 30 min. The suspension was centrifuged (15500 x g, 4 °C) and the resulting solution stored in aliquots at either 4 °C or -80 °C. The enzymatic activity was measured spectrophotometrically by NADPH-generation in the oxidation of isopropanol at 25 °C essentially as described in the literature.Error: Reference source not found The samples were analyzed by 10% SDS-PAGE and the protein concentration determined using the Biorad Bradford assay with BSA as standard. Before use the samples were incubated at 50 °C for 20 min to reactivate 2°ADH.

**Table 4**: Substances assayed as stabilizing additive (semi-quantitative weighing).

| Additives | Effecta | Remarks |
| --- | --- | --- |
| Monosaccharides: glucose / xylose | + / 0 | Beneficial effects of sugars have been described for other enzymes, see ref. Error: Reference source not found |
| Disaccharides: saccharose / lactose | 0 / + |  |
| Sugar alcohols: sorbitol / mannitol | 0 / 0 |  |
| Bovine Serum Albumin (BSA) | + | For beneficial effects compare ref. Error: Reference source not found |
| Non-ionic detergents: Triton X-100, Tween-20, Tween-80 | - / +++/ ++ |  |
| Flavin-Adenin-Dinucleotide (FAD) | ++ | Stabilizing effect of FAD is described in ref. Error: Reference source not found |
| Catalase | 0 | Catalase might stabilize enzyme towards H2O2 |

a 0 = no significant effect on enzyme stability, + - +++ = increasingly beneficial effect on stability, - = negative effect on stability.

50 mM Tris-HCl (pH 8.5 at room temperature, estimated pH at 40 °C about 8.0[[1]](#endnote-2)) was used in all cases. The assays were performed with 500 L buffer including the enzyme preparation as described above and supplied with the additives of choice mixed with 500 L of the organic solvent in an Eppendorf tube that was kept at 1400 rpm and 40 °C. Aliquots of 25 L of the aqueous phase were taken and analyzed by NADPH-depletion for their residual activity as described.Error: Reference source not found,Error: Reference source not found,Error: Reference source not found

*Composition of the Standard buffer in the in-vitro catalysis experiments:*

- 50 mM Tris-HCl, pH 8.5 at 25 °C (corresponds to ca. pH 8.0 at 40 °C)
- 2 g/L BSA
- 5% (w/v) glucose
- 5% (w/v) lactose
- 0.1% (v/v) Tween-20

*In vitro-catalysis in the BV- oxidation of phenylacetone (****3****):*

In a flask, the following ingredients were successively added: 5 mL of standard buffer, 100 µL of NADP+-stock solution (final concentration = 0.5 mM), WT-PAMOsolution (final activity = 0.6 U/mL), 2°ADH solution (final activity = 4 U/mL), then the volume of the aqueous phase was adjusted to 10 mL with standard buffer. Subsequently 20 µL of phenylacetone (**3**), 100 µL of isopropanol, 50 µL of 2-pentanol and 10 mL of cyclohexane were added. The reaction was heated at 40 °C, phase separation was achieved by centrifugation. A sample of the reaction was analyzed by GC after 3 days and 80% conversion was reached. GC-method: HP-5 column (30 m x 0.32 mm x 0.25 m); 60 °C (2 min) – 30 °C/min - 250 °C (5 min).

*In vitro-catalysis in the BV- oxidation of rac-bicyclo[3.2.0]hept-2-en-6-one (****1****):*

The ingredients for the aqueous phase were mixed as described above for substrate **3**, subsequently 100 µL of isopropanol, 100 µL of 2-pentanol, 10 mL of cyclohexane and 100 µL (0.1025 g, 0.95 mmol) of *rac*-bicyclo[3.2.0]hept-2-en-6-one (**1**) were added. The reaction was heated at 40 °C. 95% conversion of starting material was reached after 4 days, separation of the two liquid phases was achieved by centrifigation. The stereochemistry of the products was assigned based on the literature.Error: Reference source not found GC-method: BGB-178 column (15 m x 0.25 mm x 0.25 m); isothermal 115 °C.

*In vitro-catalysis in the BV-oxidation of 2-phenylcyclohexanone (****5****):*

In a 1 L flask, we added successively: Standard buffer, NADP+-stock solution (final concentration = 0.5 mM), P3-PAMO- and 2°ADH solution were mixed as described above to a final volume of 100 mL. Subsequently 1 mL of isopropanol, 1 mL of 2-pentanol, 100 mL of methyl *tert*-butyl ether, and 1 g (5.7 mmol) of 2-phenylcyclohexanone (**5**) were added. The mixture was heated at 40 °C and the progress of the reaction was followed by GC. The reaction was stopped after 24 h to reach 50% conversion. The mixture was centrifuged to facilitate separation of the two liquid phases. The organic solvent was removed under reduced pressure and the crude product was purified via silica-gel chromatography. (Eluent: pentane/ethyl acetate: 9/1). 475 mg (2.7 mmol, 47%) of 2-phenylcyclohexanone **5** and 444 mg (2.3 mmol, 40%) of the corresponding lactone (*R*)-**6** were isolated with an *ee* of 95.4%. GC-method: see reference.Error: Reference source not found

*Biphasic whole-cell catalysis in the BV-oxidation of rac-bicyclo[3.2.0]hept-2-en-6-one (****1****):*

*E. coli* TOP10 [pPAMO-P3]-expression cultures in TB-medium (supplied with 100 mg/L carbenicilline) were grown to an OD600 of 2.5-3.0 and subsequently supplemented with 5 g/L of glycerol. P3-PAMO was then heat-activated at 45 °C for 15 min.Error: Reference source not found Subsequently 20 mL of the culture were mixed with 120 µL (1.1 mmol) of *rac*-bicyclo[3.2.0]hept-2-en-6-one (**1**) and 20 mL of dioctylphthalate. The reaction was well mixed for 24 h at 37 °C and continuously supplied with air. 5 mL of the solution were extracted with 5 mL of ethyl acetate and the conversion was determined by GC analysis as described above.

1. . Calculation of thermodynamically correct pH buffers: [http://www.bi.umist.ac.uk/users/mjfrbn/buffers/makebuf.asp]. [↑](#endnote-ref-2)
